# Supplementary material
Source: Springer Nature journal article supplement (https://www.springermedizin.de/resource/supplementary/12968_2011_3259_MOESM6_ESM.pdf/9583630)

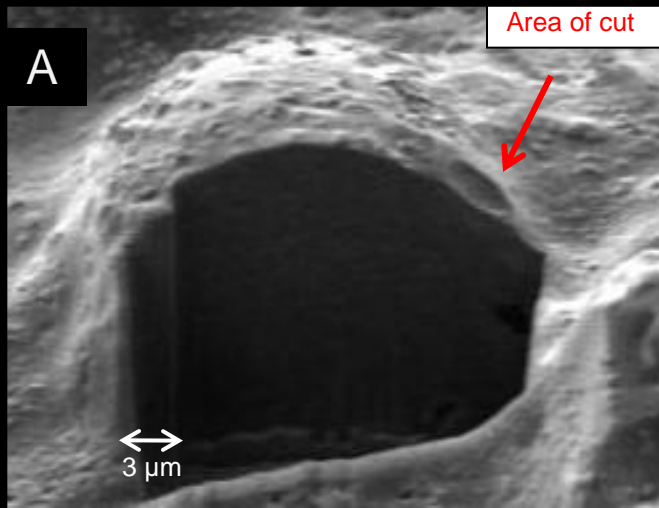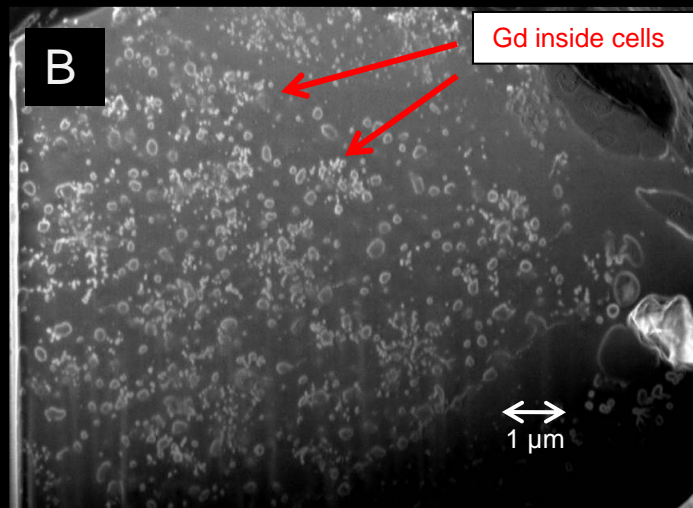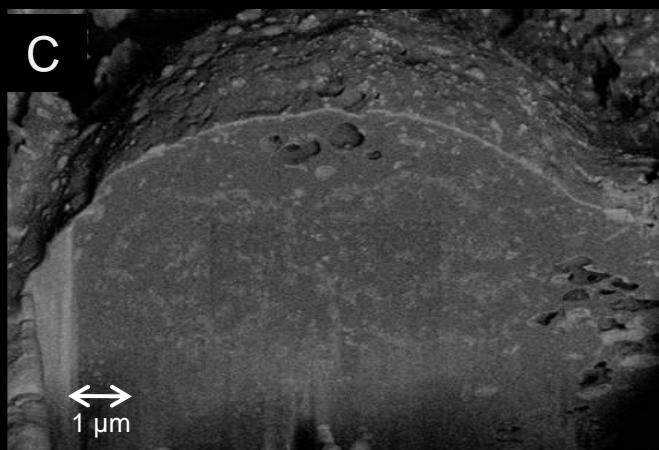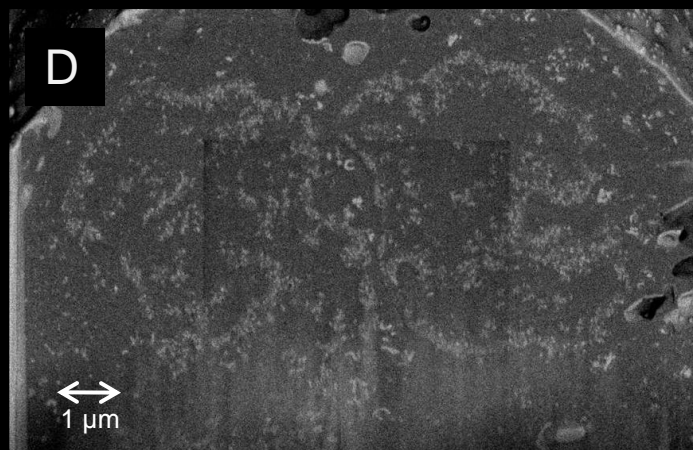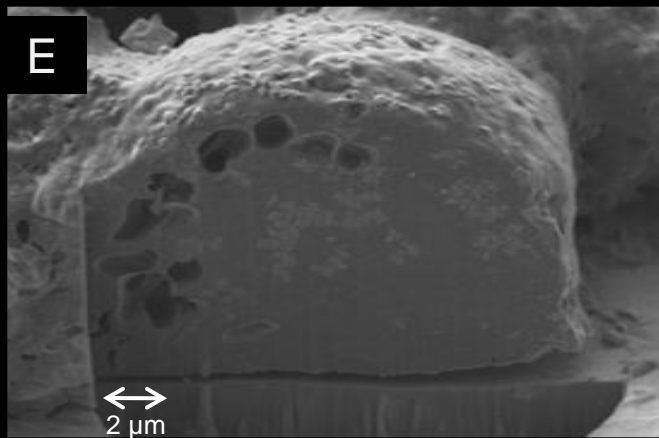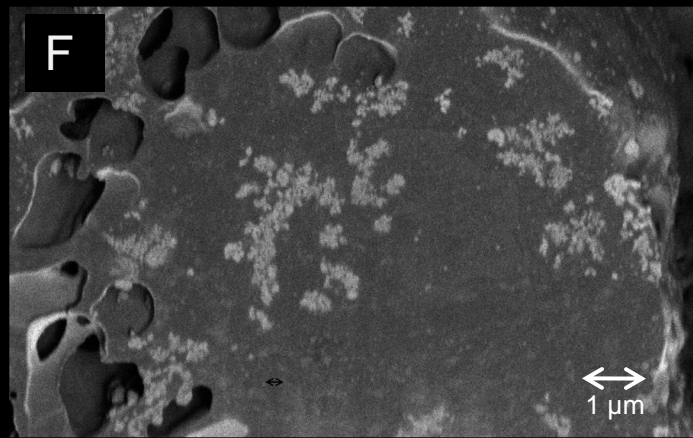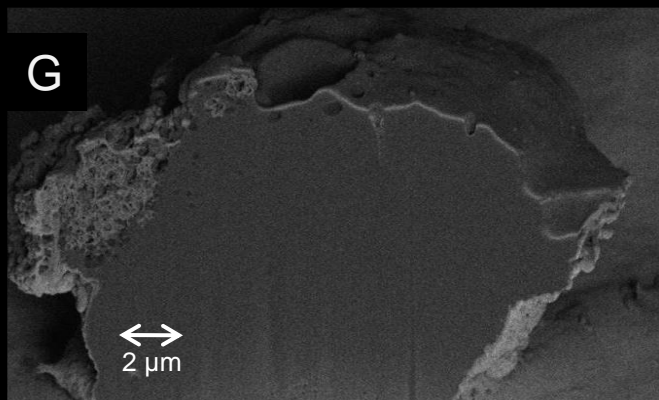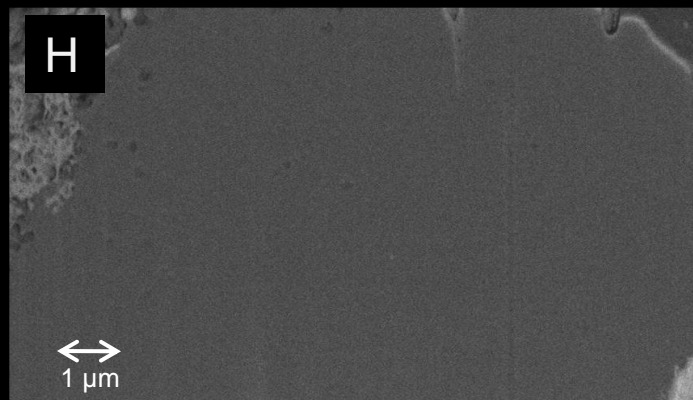

Supplement: MOESM6 [file 9583630]
